# Supplementary material for: A memory efficient finite-state source coding algorithm for audio MDCT coefficients
Source: Springer Nature journal article supplement (doi:10.1186/1687-4722-2014-22), 2014-05-12

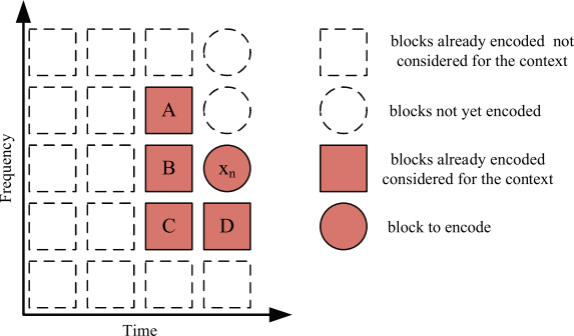

Supplement: 13636_2013_118_MOESM3_ESM.pdf [file 13636_2013_118_MOESM3_ESM.pdf]
